# Supplementary material for: Efficient and reusable ordered mesoporous WOx/SnO2 catalyst for oxidative desulfurization of dibenzothiophene
Source: Royal Society of Chemistry journal article supplement (doi:10.1039/d1ra04957g), 2021-01-01
Supplement: d1ra04957g1.pdf [file d1ra04957g1.pdf]

## **Efficient and reusable ordered mesoporous WO<sub>x</sub>/SnO<sub>2</sub> catalyst for oxidative desulfurization of dibenzothiophene**

Wenxiang Piao, †<sup>a</sup> Zhenghua Li, †<sup>b</sup> Chengbin Li,<sup>b</sup> Jin Seo Park,<sup>b</sup> Jung-ho Lee,<sup>b</sup> Zhengyang Li,<sup>b</sup> Ki Yeong Kim,<sup>b</sup> Long Yi Jin\*<sup>a</sup>, Ji Man Kim\*<sup>b</sup> and Mingshi Jin\*<sup>a</sup>

<sup>a</sup> *Department of Chemistry, Park Road 977, Yanji City, Jilin Province 133002, PR China*

<sup>b</sup> *Department of Chemistry, Sungkyunkwan University, Suwon, 16419, Republic of Korea*

\*Corresponding authors.

E-mail: Long Yi Jin (lyjin@ybu.edu.cn); jimankim@skku.edu (J. M. Kim);

msjin1231@ybu.edu.cn (M. Jin)

†These authors contributed equally.

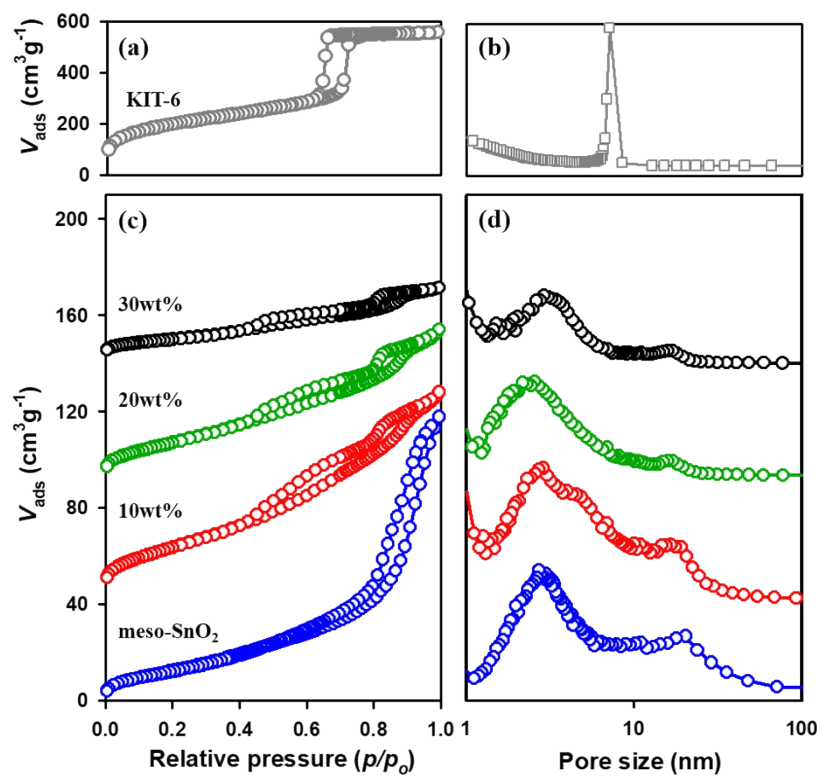

**Fig. S1.** N<sub>2</sub> sorption isotherms (a), (c) and corresponding BJH pore size distributions (b), (d) of all the catalysts.

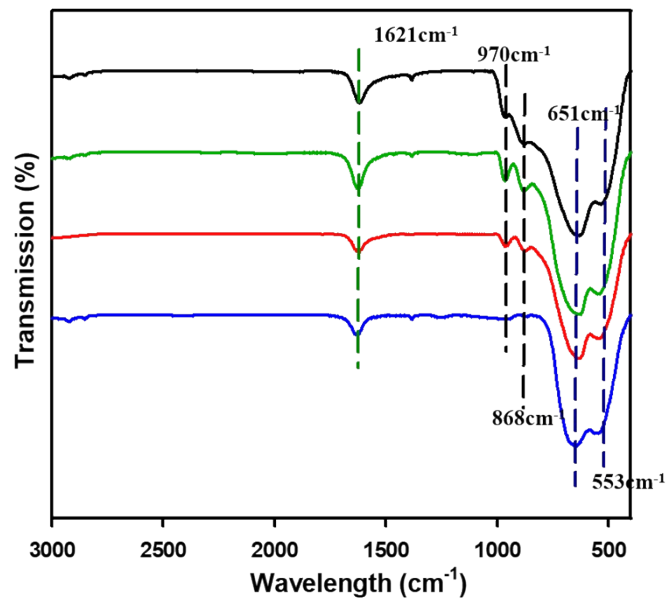

**Fig. S2.** FT-IR spectra of the prepared catalysts: (a) meso-SnO<sub>2</sub>, (b) 10 wt% WO<sub>x</sub>/meso-SnO<sub>2</sub>, (c) 20 wt% WO<sub>x</sub>/meso-SnO<sub>2</sub>, and (d) 30 wt% WO<sub>x</sub>/meso-SnO<sub>2</sub>.

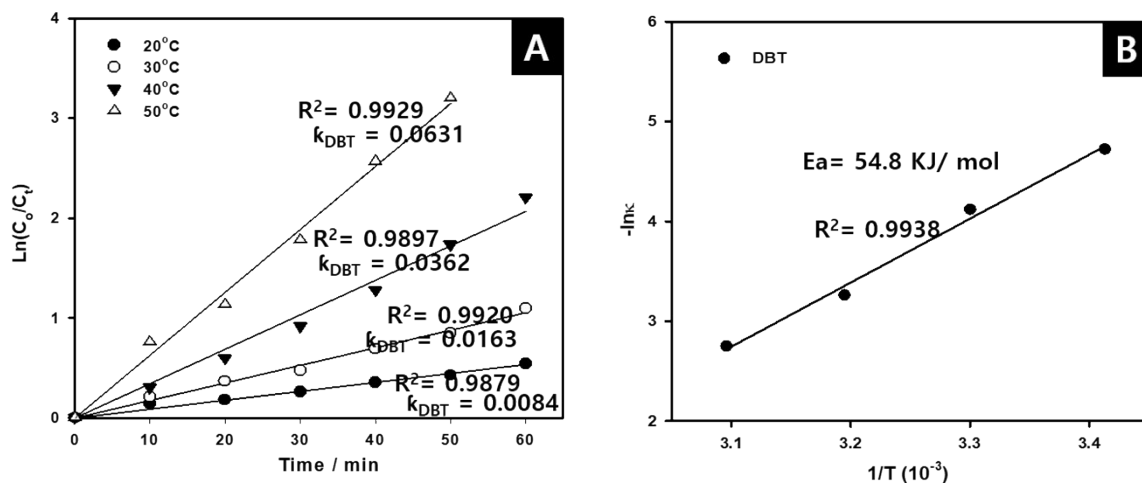

**Fig. S3.** (A) Pseudo-first-order kinetics for oxidation of DBT at different temperatures. (B) Arrhenius plot of DBT in ODS reaction on 20 wt%  $WO_x$ /meso- $SnO_2$  catalyst. Reaction conditions: model oil = 14 ml, acetonitrile = 14 ml, sulfur concentration = 2000 ppm,  $n[H_2O_2] : n[S] = 5 : 1$ , catalyst = 0.1 g, time = 60 min.
